# Supplementary material
Source: HighWire-hosted journal article supplement (https://srh.bmj.com/content/49/3/210)

**SUPPLEMENT - Integrating PrEP into Family Planning Services - A scoping review**

Supplementary table 1: Details Search Strategy

| Name of data base | Search strategy                                                                                                                                                                                                                                                                                                                                                                                                                                                                                                                                                                                                                                                                                                                                                                                                                                                                                                               | Number of records retrieved |
|-------------------|-------------------------------------------------------------------------------------------------------------------------------------------------------------------------------------------------------------------------------------------------------------------------------------------------------------------------------------------------------------------------------------------------------------------------------------------------------------------------------------------------------------------------------------------------------------------------------------------------------------------------------------------------------------------------------------------------------------------------------------------------------------------------------------------------------------------------------------------------------------------------------------------------------------------------------|-----------------------------|
| <b>MEDLINE</b>    | 1 (PrEP or preexposure prophylaxi* or pre-exposure prophylaxi*).mp. (4311)<br>2 Pre-Exposure Prophylaxis/ (1961)<br>3 1 or 2 (4311)<br>4 (family planning or contracept* or birth spac*).mp. (15827)<br>5 Family Planning Services/ (1741)<br>6 contraception/ or hormonal contraception/ or long-acting reversible contraception/ (2489)<br>7 ((sexual and reproductive) adj3 (health or healthcare)).mp. (2889)<br>8 Reproductive Health Services/ (602)<br>9 reproductive health/ or sexual health/ (2498)<br>10 exp HIV/ (16290)<br>11 exp HIV Infections/ (42748)<br>12 (hiv or hiv-1 or hiv-2 or human immunodeficiency virus*).mp. (91639)<br>13 or/4-12 (110132)<br>14 (wom?n or girl* or AGYW or adolescent* or youth).mp. (689470)<br>15 exp Women/ (4984)<br>16 Adolescent/ (307962)<br>17 14 or 15 or 16 (689470)<br>18 3 and 13 and 17 (1094)<br>19 limit 18 to (English language and yr="2012 -Current") (1081) | 1081                        |
| <b>EMBASE</b>     | 1 (PrEP or preexposure prophylaxi* or pre-exposure prophylaxi*).mp. (12854)<br>2 Pre-Exposure Prophylaxis/ (4392)<br>3 1 or 2 (12854)<br>4 (family planning or contracept* or birth spac*).mp. (165672)<br>5 family planning/ (40027)<br>6 contraception/ or hormonal contraception/ or long-acting reversible contraception/ (55412)<br>7 ((sexual and reproductive) adj3 (health or healthcare)).mp. (10082)<br>8 exp reproductive health/ (17489)<br>9 exp Human immunodeficiency virus/ (196001)<br>10 exp Human immunodeficiency virus infection/ (377192)<br>11 (hiv or hiv-1 or hiv-2 or human immunodeficiency virus*).mp. (502456)<br>12 or/4-11 (721124)                                                                                                                                                                                                                                                            | 556                         |

|                       |                                                                                                                                                                                         |      |
|-----------------------|-----------------------------------------------------------------------------------------------------------------------------------------------------------------------------------------|------|
|                       | 13 (wom#n or girl* or AGYW or adolescent* or youth).mp. (3453070)                                                                                                                       |      |
|                       | 14 female/ (9737405)                                                                                                                                                                    |      |
|                       | 15 adolescent/ (1663970)                                                                                                                                                                |      |
|                       | 16 13 or 14 or 15 (10506992)                                                                                                                                                            |      |
|                       | 17 3 and 12 and 15 (570)                                                                                                                                                                |      |
|                       | 18 limit 17 to (English language and yr="2012 -Current") (556)                                                                                                                          |      |
| <b>Web of Science</b> | # 1 (TS=(PrEP OR "preexposure prophylaxi*" OR "pre-exposure prophylaxi*") ) AND LANGUAGE: (English) Indexes=SCI-EXPANDED, SSCI, A&HCI, CPCI-S, CPCI-SSH, ESCI Timespan=2012-2020 (6944) | 1696 |
|                       | # 2 (TS=(family planning OR contracept* OR birth spac* ) AND LANGUAGE: (English) Indexes=SCI-EXPANDED, SSCI, A&HCI, CPCI-S, CPCI-SSH, ESCI Timespan=2012-2020 (42381)                   |      |
|                       | # 3 (TS=Family Planning Services) AND LANGUAGE: (English) Indexes=SCI-EXPANDED, SSCI, A&HCI, CPCI-S, CPCI-SSH, ESCI Timespan=2012-2020 (5752)                                           |      |
|                       | # 4 (TS=reproductive healthcare) AND LANGUAGE: (English) Indexes=SCI-EXPANDED, SSCI, A&HCI, CPCI-S, CPCI-SSH, ESCI Timespan=2012-2020 (2813)                                            |      |
|                       | # 5 (TS=(HIV OR HIV infect* ) AND LANGUAGE: (English) Indexes=SCI-EXPANDED, SSCI, A&HCI, CPCI-S, CPCI-SSH, ESCI Timespan=2012-2020 (148668)                                             |      |
|                       | # 6 (TS=(wom?n or girl* or AGYW or adolescent* or youth) ) AND LANGUAGE: (English) Indexes=SCI-EXPANDED, SSCI, A&HCI, CPCI-S, CPCI-SSH, ESCI Timespan=2012-2020 (914740)                |      |
|                       | # 7 (#5 OR #4 OR #3 OR #2) AND LANGUAGE: (English) Indexes=SCI-EXPANDED, SSCI, A&HCI, CPCI-S, CPCI-SSH, ESCI Timespan=2012-2020 (190857)                                                |      |
|                       | # 8 (#7 AND #6 AND #1) AND LANGUAGE: (English) Indexes=SCI-EXPANDED, SSCI, A&HCI, CPCI-S, CPCI-SSH, ESCI Timespan=2012-2020 (1696)                                                      |      |
| <b>Global Health</b>  | 1 (PrEP or preexposure prophylaxi* or pre-exposure prophylaxi*).mp. (2503)                                                                                                              | 612  |
|                       | 2 (family planning or contracept* or birth space*).mp. (19486)                                                                                                                          |      |
|                       | 3 exp family planning/ (10370)                                                                                                                                                          |      |
|                       | 4 contraceptives/ or contraception/ or injectable contraceptives/ or oral contraceptives/ (10561)                                                                                       |      |
|                       | 5 ((sexual and reproductive) adj3 (health or healthcare)).mp. (3950)                                                                                                                    |      |
|                       | 6 exp reproductive health/ (8451)                                                                                                                                                       |      |
|                       | 7 exp sexual health/ (2938)                                                                                                                                                             |      |
|                       | 8 exp human immunodeficiency viruses/ (179862)                                                                                                                                          |      |
|                       | 9 exp HIV infections/ (147094)                                                                                                                                                          |      |
|                       | 10 (hiv or hiv-1 or hiv-2 or human immunodeficiency virus*).mp. (186902)                                                                                                                |      |
|                       | 11 or/2-10 (216594)                                                                                                                                                                     |      |
|                       | 12 (wom#n or girl* or AGYW or adolescent* or youth).mp. (454945)                                                                                                                        |      |
|                       | 13 exp women/ (255165)                                                                                                                                                                  |      |
|                       | 14 exp adolescents/ (64805)                                                                                                                                                             |      |
|                       | 15 12 or 13 or 14 (455041)                                                                                                                                                              |      |
|                       | 16 1 and 11 and 15 (652)                                                                                                                                                                |      |

|                         |                                                                                                                                                                                                                                                                                                                                       |             |
|-------------------------|---------------------------------------------------------------------------------------------------------------------------------------------------------------------------------------------------------------------------------------------------------------------------------------------------------------------------------------|-------------|
|                         | 17 limit 16 to (English language and yr="2012 -Current") (612)                                                                                                                                                                                                                                                                        |             |
| <b>Cochrane Library</b> | #1 (PrEP or "preexposure prophylaxi*" or "pre-exposure prophylaxi*"):ti,ab,kw (Word variations have been searched) (1752)                                                                                                                                                                                                             | 1           |
|                         | #2 MeSH descriptor: [Pre-Exposure Prophylaxis] explode all trees (163)                                                                                                                                                                                                                                                                |             |
|                         | #3 #1 or #2 (1752)                                                                                                                                                                                                                                                                                                                    |             |
|                         | #4 ("family planning" or contracept* or birth spac*):ti,ab,kw (13440)                                                                                                                                                                                                                                                                 |             |
|                         | #5 MeSH descriptor: [Family Planning Services] explode all trees (215)                                                                                                                                                                                                                                                                |             |
|                         | #6 MeSH descriptor: [Contraception] explode all trees (448)                                                                                                                                                                                                                                                                           |             |
|                         | #7 MeSH descriptor: [Reproductive Health Services] explode all trees (449)                                                                                                                                                                                                                                                            |             |
|                         | #8 MeSH descriptor: [Sexual Health] explode all trees (38)                                                                                                                                                                                                                                                                            |             |
|                         | #9 MeSH descriptor: [HIV] explode all trees (3017)                                                                                                                                                                                                                                                                                    |             |
|                         | #10 MeSH descriptor: [HIV Infections] explode all trees (12355)                                                                                                                                                                                                                                                                       |             |
|                         | #11 (hiv or hiv-1 or hiv-2 or human immunodeficiency virus*):ti,ab,kw (26578)                                                                                                                                                                                                                                                         |             |
|                         | #12 #4 or #5 or #6 or #7 or #8 or #9 or #10 or #11 (39893)                                                                                                                                                                                                                                                                            |             |
|                         | #13 (wom?n or girl* or AGYW or adolescent* or youth):ti,ab,kw (273179)                                                                                                                                                                                                                                                                |             |
|                         | #14 MeSH descriptor: [Women] explode all trees (604)                                                                                                                                                                                                                                                                                  |             |
|                         | #15 MeSH descriptor: [Adolescent] explode all trees (102500)                                                                                                                                                                                                                                                                          |             |
|                         | #16 #13 or #14 or #15 (273179)                                                                                                                                                                                                                                                                                                        |             |
|                         | #17 #3 and #12 and #16 with Cochrane Library publication date from Aug 2012 to Aug 2020 (350)                                                                                                                                                                                                                                         |             |
| <b>Google scholar</b>   | (Preexposure prophylaxis OR Pre-exposure prophylaxis OR PrEP) AND (women OR woman OR "adolescent girls and young women" OR AGYW OR girls OR youth)) AND ("family planning" OR contracept* OR birth spac* OR "sexual health" OR "reproductive health" OR HIV OR "human immunodeficiency virus" OR HIV-1 OR HIV-2) Limited to 2012-2020 | 380         |
|                         | <b>TOTAL amount of articles retrieved from databases</b>                                                                                                                                                                                                                                                                              | <b>4326</b> |
|                         | <b>TOTAL amount of articles after removing duplicates</b>                                                                                                                                                                                                                                                                             | <b>2651</b> |

## Supplementary table 2 Inclusion Criteria

|                            |                                                                                                                                                                                                                                                                                                                                              |
|----------------------------|----------------------------------------------------------------------------------------------------------------------------------------------------------------------------------------------------------------------------------------------------------------------------------------------------------------------------------------------|
| <b>Inclusion criteria:</b> | English language, all article types, all settings, including women and adolescent girls (10-19 years of age, rational: according to WHO definition of adolescence), relating to family planning services or care, key populations (e.g. sex worker, injecting drug users, trans women).                                                      |
| <b>Exclusion criteria:</b> | pregnant and postpartum women (rational: pregnant and postpartum women rarely attend family planning services), basic science (e.g. clinical or pharmacological research/ trials on PrEP efficacy, not containing PrEP as main intervention, studies that omit important details (e.g. title or author) or focus on other diseases than HIV. |

## Supplementary table 3 Ongoing Studies

| <b>Ongoing studies</b> |                     |                                                                                                                                                                                          |                     |                                               |                                   |
|------------------------|---------------------|------------------------------------------------------------------------------------------------------------------------------------------------------------------------------------------|---------------------|-----------------------------------------------|-----------------------------------|
| <b>#</b>               | <b>Investigator</b> | <b>Title</b>                                                                                                                                                                             | <b>Country</b>      | <b>Study type</b>                             | <b>Protocol</b>                   |
| <b>A</b>               | Sales et al.        | Pre-Exposure Prophylaxis Integration into Family Planning Services at Title X Clinics in the Southeastern United States: A Geographically-Targeted Mixed Methods Study (Phase 1 ATN 155) | US                  | A Geographically-Targeted Mixed Methods Study | Jmir Research Protocols 8(6): 10. |
| <b>B</b>               | Celum et al.        | A Cohort for Evaluation of Open-label PrEP Delivery Among Kenyan and South African Women: The POWER Cohort, study ID STUDY00000950                                                       | Kenya, South Africa | Cohort study                                  | NCT03490058                       |
| <b>C</b>               | Kohler et al.       | Standardized Patient Encounters to Improve PrEP Counselling for Adolescent Girls and Young Women in Kenya (PrYA-SP)                                                                      | Kenya               | Behavioural: Clinician training intervention  | NCT03875950                       |

## Supplementary table 4 Included Studies

| <b>#</b>                               | <b>Author &amp; Year</b> | <b>Title</b>                                                                                                                                                                                                            | <b>Journal</b>         | <b>Country</b> | <b>Article type/ Study type</b>                                  |
|----------------------------------------|--------------------------|-------------------------------------------------------------------------------------------------------------------------------------------------------------------------------------------------------------------------|------------------------|----------------|------------------------------------------------------------------|
| <b>Low-and middle-income countries</b> |                          |                                                                                                                                                                                                                         |                        |                |                                                                  |
| <b>1</b>                               | Gombe et al. (2020)      | Key barriers and enablers associated with uptake and continuation of oral pre-exposure prophylaxis (PrEP) in the public sector in Zimbabwe: Qualitative perspectives of general population clients at high risk for HIV | PLoS One               | Zimbabwe       | Full article/ Qualitative study                                  |
| <b>2</b>                               | Sila et al. (2020)       | High Awareness, Yet Low Uptake, of Pre-Exposure Prophylaxis Among Adolescent                                                                                                                                            | AIDS Patient Care STDS | Kenya          | Full article/ Cross-sectional study conducted as follow-on study |

|    |                                | Girls and Young Women Within Family Planning Clinics in Kenya                                                                                                                                            |                |                                           |                                                                   |
|----|--------------------------------|----------------------------------------------------------------------------------------------------------------------------------------------------------------------------------------------------------|----------------|-------------------------------------------|-------------------------------------------------------------------|
| 3  | Wanga et al. (2020)            | Uptake and impact of facility-based HIV self-testing on PrEP delivery: a pilot study among young women in Kisumu, Kenya                                                                                  | J Int AIDS Soc | Kenya                                     | Full article/ Implementation research study Cohort study          |
| 4  | Were et al. (2020)             | Oral pre-exposure prophylaxis (PrEP) and family planning (FP) integration to improve PrEP continuation among adolescent girls and young women (AGYW) in Kenya                                            | J Int AIDS Soc | Kenya                                     | Conference abstract/ no specifics provided                        |
| 5  | Beima-Sofie et al. (2019)      | Implementation challenges and strategies in integration of PrEP into maternal and child health and family planning services: Experiences of frontline healthcare workers in Kenya                        | J Int AIDS Soc | Kenya                                     | Conference presentation/ Qualitative study                        |
| 6  | Celum et al. (2019)            | HIV pre-exposure prophylaxis for adolescent girls and young women in Africa: from efficacy trials to delivery                                                                                            | J Int AIDS Soc | Kenya, South Africa, Tanzania, Zimbabwe   | Commentary Review/ Na                                             |
| 7  | Hodges-Mameletzi et al. (2019) | Pre-Exposure Prophylaxis for HIV Prevention in Women: Current Status and Future Directions                                                                                                               | Drugs          | n/a                                       | Narrative review/ Na                                              |
| 8  | Mugwanya et al. (2019)         | Integrating preexposure prophylaxis delivery in routine family planning clinics: A feasibility programmatic evaluation in Kenya                                                                          | PLoS Medicine  | Kenya                                     | Full article/ Pilot open-label, "real-world" implementation study |
| 9  | Pintye et al. (2019)           | Frequent detection of tenofovir-diphosphate among young Kenyan women in a real-world PrEP implementation program                                                                                         | J Int AIDS Soc | Kenya                                     | Brief report/ Pilot open-label, "real-world" implementation study |
| 10 | Roberts et al. (2019)          | The role of costing in the introduction and scale-up of HIV pre-exposure prophylaxis: evidence from integrating PrEP into routine maternal and child health and family planning clinics in western Kenya | J Int AIDS Soc | Kenya                                     | Full article/ Costing study                                       |
| 11 | Dunbar et al. (2018)           | Understanding and measuring uptake and coverage of oral pre-exposure prophylaxis delivery among adolescent girls and young women in sub-Saharan Africa                                                   | Sex Health     | DREAMS countries (Kenya, Lesotho, Malawi, | Full article/ Literature review                                   |

|                              |                              |                                                                                                                                                                     |                                    |                                                                                            |                                                                          |
|------------------------------|------------------------------|---------------------------------------------------------------------------------------------------------------------------------------------------------------------|------------------------------------|--------------------------------------------------------------------------------------------|--------------------------------------------------------------------------|
|                              |                              |                                                                                                                                                                     |                                    | Mozambique,<br>South Africa,<br>Swaziland,<br>Tanzania,<br>Uganda,<br>Zambia,<br>Zimbabwe) |                                                                          |
| 12                           | Gombe et al. (2018)          | Integrating oral HIV pre-exposure prophylaxis (PrEP) in a public family planning facility and youth centre to inform national roll out in Zimbabwe                  | J Int AIDS Soc                     | Zimbabwe                                                                                   | Conference abstract/ Qualitative study                                   |
| 13                           | Mugwanya et al. (2018)       | Uptake of PrEP within clinics providing integrated family planning and PrEP services: Results from a large implementation program in Kenya                          | J Int AIDS Soc                     | Kenya                                                                                      | Conference abstract/ Pilot open-label, "real-world" implementation study |
| 14                           | Mugwanya et al. (2018)       | One-month PrEP Continuation Among Adolescent Girls and Young Women in Routine Maternal Child Health and Family Planning Clinics                                     | AIDS Res Hum Retroviruses          | Kenya                                                                                      | Conference abstract/ Pilot open-label, "real-world" implementation study |
| 15                           | Omollo et al. (2018)         | PrEP delivery platforms: Are family planning clinics an option?                                                                                                     | AIDS Res Hum Retroviruses          | Kenya                                                                                      | Conference abstract/ Open-label prospective study                        |
| 16                           | Rousseau-Jemwa et al. (2018) | A comparative study of risk among adolescent girls and young women who accept or decline PrEP uptake from a community-based mobile clinic                           | 22nd international AIDS conference | Kenya/ South Africa                                                                        | Conference abstract/ Open label PrEP implementation study                |
| <b>High-income countries</b> |                              |                                                                                                                                                                     |                                    |                                                                                            |                                                                          |
| 17                           | Brant et al. (2020)          | Integrating HIV Pre-Exposure Prophylaxis into Family Planning Care: A RE-AIM Framework Evaluation                                                                   | AIDS Patient Care STDS             | USA, Washington DC                                                                         | Full article/ Prospective cohort study                                   |
| 18                           | Calabrese et al. (2020)      | Contraception as a Potential Gateway to Pre-Exposure Prophylaxis: US Women's Pre-Exposure Prophylaxis Modality Preferences Align with Their Birth Control Practices | AIDS Patient Care STDS             | USA, Connecticut                                                                           | Full article/ Cross-sectional study                                      |

|    |                         |                                                                                                                                                                       |                                  |                   |                                                       |
|----|-------------------------|-----------------------------------------------------------------------------------------------------------------------------------------------------------------------|----------------------------------|-------------------|-------------------------------------------------------|
| 19 | Fields et al. (2020)    | Understanding Opportunities to Discuss HIV Prep in Contraceptive Counselling Services Provided to Adolescent Women                                                    | J Adolesc Health                 | USA               | Conference poster/ Secondary analysis study           |
| 20 | Johnson et al. (2020)   | Awareness and Intent to Use Pre-exposure Prophylaxis (PrEP) Among African American Women in a Family Planning Clinic                                                  | J Racial Ethn Health Disparities | USA               | Full article, Cross-sectional study                   |
| 21 | O'Connell et al. (2020) | The Impact of HIV Pre-Exposure Prophylaxis (PrEP) Counselling on PrEP Knowledge and Attitudes among Women Seeking Family Planning Care                                | J Womens Health                  | USA, Philadelphia | Full article, Cross-sectional study Survey            |
| 22 | O'Malley et al. (2020)  | Intimate Partner Violence, HIV Pre-Exposure Prophylaxis (PrEP) Acceptability, and Attitudes About Use: Perspectives of Women Seeking Care at a Family Planning Clinic | AIDS Behav                       | USA, Pittsburgh   | Full article, Mixed-methods study                     |
| 23 | Sales et al. (2020)     | Where can Southern girls go for prep? Examining the PrEP-providing practices of Title-X funded family planning clinics across the Southern US                         | J Adolesc Health                 | USA               | Abstract/ Explanatory, sequential mixed-methods study |
| 24 | Unger et al. (2020)     | Providing Pre-exposure Prophylaxis in Family Planning Centers: A Survey of Provider Knowledge and Attitudes                                                           | J Assoc Nurses AIDS Care         | USA               | Full article/ Cross-sectional study                   |
| 25 | Carley et al. (2019)    | Interest in Pre-exposure Prophylaxis (PrEP) for HIV is Limited Among Women in a General Obstetrics & Gynaecology Setting                                              | AIDS Behav                       | USA, Louisiana    | Full article/ Cross-sectional study                   |
| 26 | Sales et al. (2019)     | Impact of PrEP Training for Family Planning Providers on HIV Prevention Counselling and Patient Interest in PrEP in Atlanta, Georgia                                  | J Acquir Immune Defic Syndr      | USA, Atlanta      | Full article/ Implementation study                    |
| 27 | Sales et al. (2019)     | Patient recommendations for PrEP information dissemination at family planning clinics in Atlanta, Georgia                                                             | Contraception                    | USA, Atlanta      | Full article/ Cross-sectional study                   |
| 28 | Calabrese et al. (2018) | HIV Pre-Exposure Prophylaxis Stigma as a Multidimensional Barrier to Uptake Among Women Who Attend Planned Parenthood                                                 | J Acquir Immune Defic Syndr      | USA, Connecticut  | Full article/ Cross-sectional study                   |
| 29 | Haider et al. (2018)    | Examining knowledge of and attitudes toward preexposure prophylaxis (PrEP) among HIV-vulnerable women in a Chicago-based family planning clinic                       | Contraception                    | USA, Chicago      | Abstract/ Mixed-methods study                         |

|    |                         |                                                                                                                                                      |                           |                          |                                            |
|----|-------------------------|------------------------------------------------------------------------------------------------------------------------------------------------------|---------------------------|--------------------------|--------------------------------------------|
| 30 | Koren et al. (2018)     | HIV Pre-Exposure Prophylaxis and Women: Survey of the Knowledge, Attitudes, and Beliefs in an Urban Obstetrics/Gynaecology Clinic                    | AIDS Patient Care STDS    | USA, Philadelphia        | Full article/ Cross-sectional study Survey |
| 31 | Pollock et al. (2018)   | Role of Preexposure Prophylaxis in the Reproductive Health of Women at Risk for Human Immunodeficiency Virus Infection                               | Obstet Gynecol            | USA                      | Current commentary/ Na                     |
| 32 | Scott et al. (2018)     | Knowledge and acceptability of HIV preexposure prophylaxis (PrEP) among women presenting for family planning services in a high-prevalence community | Contraception             | USA, Washington DC       | Abstract/ Cross-sectional study            |
| 33 | Seidman et al. (2018)   | Family planning providers' role in offering PrEP to women                                                                                            | Contraception             | USA                      | Review article/ Na                         |
| 34 | Garfinkel et al. (2017) | Predictors of HIV-related risk perception and PrEP acceptability among young adult female family planning patients                                   | AIDS Care                 | USA, Baltimore City      | Full article/ Cross-sectional study        |
| 35 | Sanders et al. (2017)   | Integration of prep in an academic adolescent clinic & impact of prep use on sexually transmitted infection (STI) rates                              | Sex Transm Infect         | USA, Baltimore City      | Abstract/ No specifics provided            |
| 36 | Seidman et al. (2016)   | United States family planning providers' knowledge of and attitudes towards preexposure prophylaxis for HIV prevention: a national survey            | Contraception             | USA                      | Full article/ Cross-sectional study        |
| 37 | Seidman et al. (2016)   | Women's Knowledge of, Interest in, and Eligibility for HIV Pre-exposure Prophylaxis at Family Planning Clinics in Northern California                | AIDS Res Hum Retroviruses | USA, Northern California | Meeting abstract/ Cross-sectional study    |
| 38 | Seidman et al. (2016)   | Integrating Preexposure Prophylaxis for Human Immunodeficiency Virus Prevention Into Women's Health Care in the United States                        | Obstet Gynecol            | USA,                     | Commentary/ Na                             |

Na/ not applicable



Figure a: PRISMA flowchart

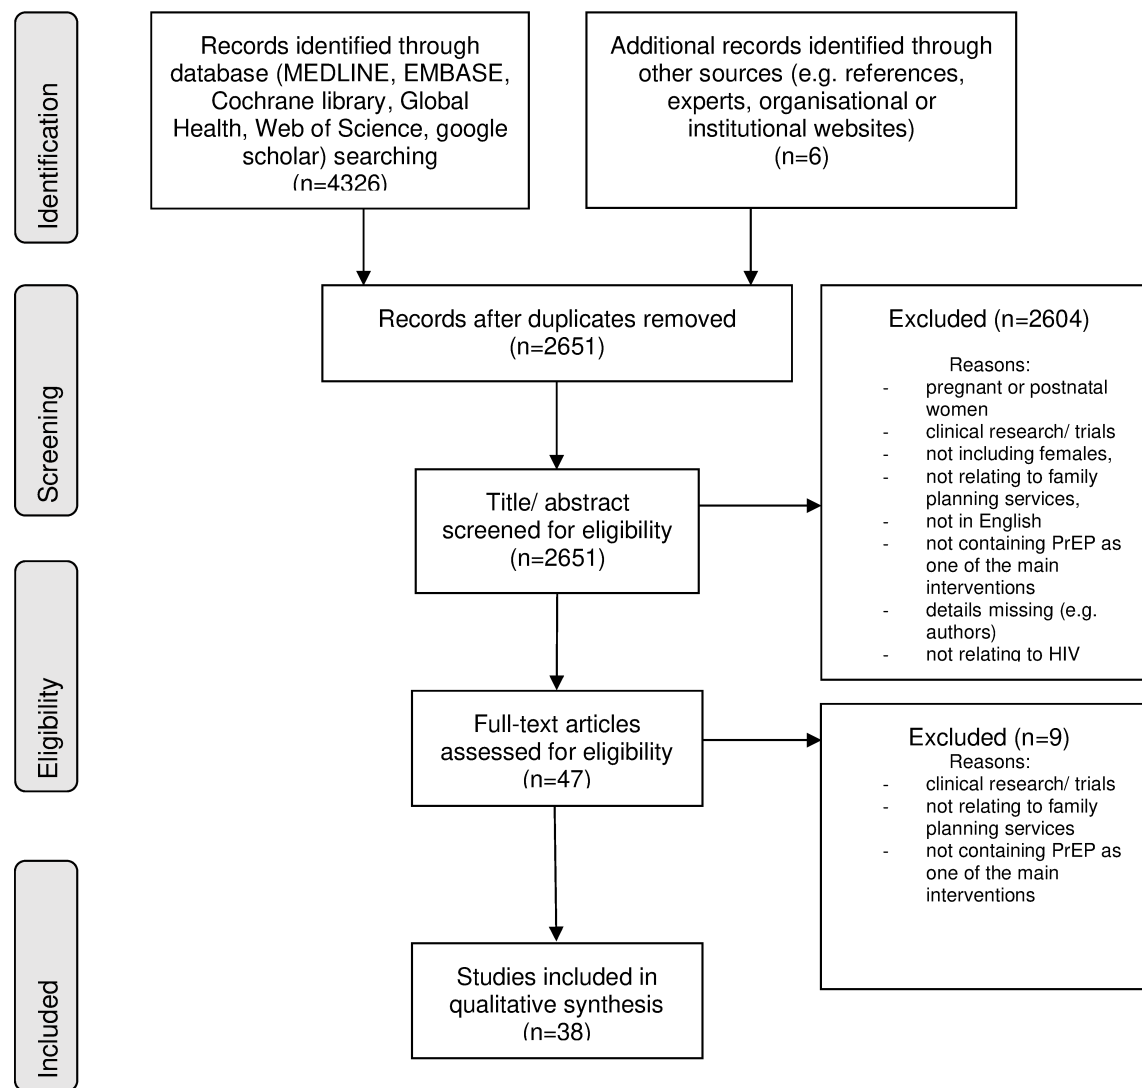

Supplement: inline-supplementary-material-1 [file inline-supplementary-material-1.pdf]
